# Supplementary material for: Blood biochemical and gut microbiotic neural network models forecasting human biological age
Source: Aging (Albany NY). 2026 Mar 11;18(1):102–16. doi: 10.18632/aging.206360 (PMC13285951; doi:10.18632/aging.206360)
Supplement: Supplementary Table 1 [file aging-18-1-206360-s001.xlsx]

## Sheet: ST1A Blood tests list
Short name	Full name	Group	Units
25(OH)D	25-hydroxyvitamin D	hormonal and vitamin status markers	ng/ml
Adiponectin	Adiponectin	adiponectins	µg/ml
ADMA	Asymmetric dimethylarginine	endothelial dysfunction markers	µmol/l
Albumin	Albumin	serum biochemical parameters	mmol/l
ALP	Alkaline phosphatase	serum biochemical parameters	U/l
ALT	Alanine aminotransferase	serum biochemical parameters	U/l
ApoB	Apolipoprotein B	carbohydrate and lipid metabolism markers	g/l
AST	Aspartate aminotransferase	serum biochemical parameters	U/l
B cell count (CD19+)	B lymphocyte count (CD19+)	immune aging markers	10^9/l
B cells (CD19+)	B lymphocytes (CD19+)	immune aging markers	%
BASO	Basophil count	general blood tests	10^9/l
BASO%	Basophil percentage	general blood tests	%
BCL-1	B-cell lymphoma 1 protein	cellular aging markers	ng/ml
CD4/CD8 ratio	CD4 to CD8 ratio	immune aging markers	No units
Cholesterol	Total cholesterol	carbohydrate and lipid metabolism markers	mmol/l
CML	Carboxymethyllysine	extracellular matrix state markers	ng/ml
C-peptide	C-peptide	carbohydrate and lipid metabolism markers	ng/ml
Creatinine	Creatinine	serum biochemical parameters	µmol/l
Cystatin_C	Cystatin C	serum biochemical parameters	mg/l
Cytotoxic T cells (CD3+CD8+)	Cytotoxic T lymphocytes (CD3+CD8+)	immune aging markers	%
Cytotoxic T count (CD3+CD8+)	Cytotoxic T lymphocyte count (CD3+CD8+)	immune aging markers	10^9/l
DHEAS	Dehydroepiandrosterone sulfate	hormonal and vitamin status markers	µg/dl
DPT (CD4+CD8+)	Double-positive T cells (CD4+CD8+)	immune aging markers	%
DPT count (CD4+CD8+)	Double-positive T cell count (CD4+CD8+)	immune aging markers	10^9/l
EOS	Eosinophil count	general blood tests	10^9/l
Estradiol	Estradiol	hormonal and vitamin status markers	pg/ml
FGF-21	Fibroblast growth factor 21	mitochondrial dysfunction markers	pg/ml
Free testosterone	Free testosterone	hormonal and vitamin status markers	pg/ml
Fructosamine	Fructosamine	carbohydrate and lipid metabolism markers	µmol/l
Glucose	Glucose	carbohydrate and lipid metabolism markers	mmol/l
HbA1c	Glycated hemoglobin	carbohydrate and lipid metabolism markers	%
HCT	Hematocrit	general blood tests	%
HDL	High-density lipoprotein	carbohydrate and lipid metabolism markers	mmol/l
Helper T cells (CD3+CD4+)	Helper T lymphocytes (CD3+CD4+)	immune aging markers	%
Helper T count (CD3+CD4+)	Helper T lymphocyte count (CD3+CD4+)	immune aging markers	10^9/l
HGB	Hemoglobin	general blood tests	g/l
Homocysteine	Homocysteine	inflammatory markers	µmol/l
hs-CRP	High-sensitivity C-reactive protein	inflammatory markers	mg/l
IG	Immature granulocyte count	general blood tests	10^9/l
IG%	Immature granulocyte percentage	general blood tests	%
IGF-1	Insulin-like growth factor 1	hormonal and vitamin status markers	ng/ml
IL-6	Interleukin-6	inflammatory markers	pg/ml
Insulin	Insulin	hormonal and vitamin status markers	µIU/ml
Iron	Iron	serum biochemical parameters	µmol/l
Klotho	Klotho protein	cellular aging markers	ng/ml
Leptin	Leptin	adiponectins	ng/ml
LYM	Lymphocyte count	general blood tests	10^9/l
LYM%	Lymphocyte percentage	general blood tests	%
MCH	Mean corpuscular hemoglobin	general blood tests	pg
MCHC	Mean corpuscular hemoglobin concentration	general blood tests	g/l
MCV	Mean corpuscular volume	general blood tests	fl
MMP-9	Matrix metalloproteinase-9	extracellular matrix state markers	ng/ml
MONO	Monocyte count	general blood tests	10^9/l
MONO%	Monocyte percentage	general blood tests	%
MPV	Mean platelet volume	general blood tests	fl
NEU	Neutrophil count	general blood tests	10^9/l
NEU%	Neutrophil percentage	general blood tests	%
NK cells (CD3-CD16+CD56+)	Natural killer cells (CD3-CD16+CD56+)	immune aging markers	%
NK cells (CD3-CD8+)	Natural killer cells (CD3-CD8+)	immune aging markers	%
NK count (CD3-CD16+CD56+)	Natural killer cell count (CD3-CD16+CD56+)	immune aging markers	10^9/l
NK count (CD3-CD8+)	Natural killer cell count (CD3-CD8+)	immune aging markers	10^9/l
NKT cells (CD3+CD16+56+)	Natural killer T cells (CD3+CD16+56+)	immune aging markers	%
NKT count (CD3+CD16+56+)	Natural killer T cell count (CD3+CD16+56+)	immune aging markers	10^9/l
NSE	Neuron-specific enolase	serum biochemical parameters	ng/ml
NT-proBNP	N-terminal pro-brain natriuretic peptide	serum biochemical parameters	pg/ml
PCT	Plateletcrit	general blood tests	%
PDW	Platelet distribution width	general blood tests	%
PLT	Platelet count	general blood tests	10^9/l
Progesterone	Progesterone	hormonal and vitamin status markers	ng/ml
RBC	Red blood cell count	general blood tests	10^12/l
RDW	Red cell distribution width	general blood tests	%
SDMA	Symmetric dimethylarginine	endothelial dysfunction markers	µmol/l
SHBG	Sex hormone-binding globulin	hormonal and vitamin status markers	nmol/l
T cell count (CD3+)	T lymphocyte count (CD3+)	immune aging markers	10^9/l
T cell subsets	T helper and cytotoxic subsets	immune aging markers	10^9/l
T cells (CD3+)	T lymphocytes (CD3+)	immune aging markers	%
T3	Triiodothyronine	hormonal and vitamin status markers	pg/ml
TBNK lymphocytes	T, B, NK lymphocytes	immune aging markers	10^9/l
Total bilirubin	Total bilirubin	serum biochemical parameters	µmol/l
TSH	Thyroid-stimulating hormone	hormonal and vitamin status markers	µIU/ml
Urea	Urea	serum biochemical parameters	mmol/l
Uric acid	Uric acid	serum biochemical parameters	µmol/l
vWF	von Willebrand factor	endothelial dysfunction markers	%
WBC	White blood cell count	general blood tests	10^9/l
Zonulin	Zonulin	integrity of cellular barriers markers	ng/ml

## Sheet: ST1B Blood tests correlations
		Whole			Males			Females
Blood test	min_corr_abs	corr	corr_abs	pvalue	corr	corr_abs	pvalue	corr	corr_abs	pvalue
25(OH)D	0.07	-0.09	0.09	0.0659641	0.07	0.07	0.483192	-0.13	0.13	0.0188451
Adiponectin	0.05	0.31	0.31	4.03485e-10	0.05	0.05	0.645745	0.35	0.35	3.93914e-10
ADMA	0.1	0.13	0.13	0.0100412	0.17	0.17	0.0950928	0.1	0.1	0.0675122
Albumin	0.29	-0.39	0.39	7.64044e-16	-0.46	0.46	3.837e-06	-0.29	0.29	1.39665e-07
ALP	0.1	0.29	0.29	4.09611e-09	-0.1	0.1	0.337619	0.43	0.43	2.12451e-15
ALT	0.01	-0.15	0.15	0.00276657	-0.28	0.28	0.00621629	0.01	0.01	0.901977
ApoB	0.22	0.22	0.22	7.66236e-06	0.26	0.26	0.0124915	0.22	0.22	7.7803e-05
AST	0	0	0	0.966706	-0.19	0.19	0.0754005	0.14	0.14	0.0108709
B cell count (CD19+)	0.1	-0.13	0.13	0.0121888	-0.19	0.19	0.0726676	-0.1	0.1	0.094951
B cells (CD19+)	0.18	-0.19	0.19	0.000189102	-0.21	0.21	0.0425217	-0.18	0.18	0.00203202
BASO	0.09	0.09	0.09	0.0598583	0.13	0.13	0.231635	0.09	0.09	0.132728
BASO%	0.03	0.06	0.06	0.249394	0.03	0.03	0.799913	0.06	0.06	0.282265
BCL-1	0	0	0	0.928068	0.05	0.05	0.657713	0.01	0.01	0.892639
CD4/CD8 ratio	0.15	0.23	0.23	4.95835e-06	0.28	0.28	0.00625403	0.15	0.15	0.00959261
Cholesterol	0.16	0.21	0.21	3.06048e-05	0.23	0.23	0.0282836	0.16	0.16	0.00431433
CML	0	0	0	0.941707	0.06	0.06	0.542227	-0.01	0.01	0.827454
C-peptide	0.14	0.26	0.26	7.24721e-08	0.14	0.14	0.191558	0.32	0.32	7.70094e-09
Creatinine	0.04	0.11	0.11	0.0224796	0.04	0.04	0.673318	0.31	0.31	4.65519e-08
Cystatin_C	0.41	0.66	0.66	1.21692e-51	0.41	0.41	5.01585e-05	0.73	0.73	1.61593e-53
Cytotoxic T cells (CD3+CD8+)	0.15	-0.19	0.19	0.000174123	-0.2	0.2	0.0506987	-0.15	0.15	0.00807559
Cytotoxic T count (CD3+CD8+)	0.1	-0.15	0.15	0.00271158	-0.24	0.24	0.018013	-0.1	0.1	0.08681
DHEAS	0.68	-0.74	0.74	7.4464e-70	-0.76	0.76	7.07893e-19	-0.68	0.68	1.6054e-42
DPT (CD4+CD8+)	0.09	0.18	0.18	0.000357911	0.09	0.09	0.368631	0.17	0.17	0.00252808
DPT count (CD4+CD8+)	0.05	0.17	0.17	0.000539648	0.05	0.05	0.609261	0.18	0.18	0.00115699
EOS	0.07	0.07	0.07	0.175641	0.13	0.13	0.215794	0.09	0.09	0.129335
Estradiol	0.19	-0.49	0.49	4.61592e-25	-0.19	0.19	0.0657596	-0.53	0.53	5.39954e-24
FGF-21	0.2	0.21	0.21	1.48018e-05	0.29	0.29	0.00450963	0.2	0.2	0.000389322
Free testosterone	0.25	-0.37	0.37	1.20168e-14	-0.61	0.61	7.2769e-11	-0.25	0.25	7.19425e-06
Fructosamine	0.07	0.07	0.07	0.152274	-0.14	0.14	0.1921	0.14	0.14	0.0133485
Glucose	0.3	0.38	0.38	5.66576e-15	0.3	0.3	0.00312737	0.41	0.41	8.94397e-14
HbA1c	0.51	0.54	0.54	3.46926e-32	0.51	0.51	1.53689e-07	0.52	0.52	2.18083e-22
HCT	0.03	-0.19	0.19	0.000104056	-0.31	0.31	0.00256812	0.03	0.03	0.648787
HDL	0.02	0.02	0.02	0.681899	0.09	0.09	0.413416	-0.09	0.09	0.108247
Helper T cells (CD3+CD4+)	0.08	0.21	0.21	2.52089e-05	0.29	0.29	0.00545988	0.08	0.08	0.177494
Helper T count (CD3+CD4+)	0.06	0.11	0.11	0.0221013	0.1	0.1	0.348319	0.06	0.06	0.308573
HGB	0.01	-0.22	0.22	8.76093e-06	-0.43	0.43	2.01465e-05	0.01	0.01	0.891474
Homocysteine	0.13	0.36	0.36	5.61298e-14	0.13	0.13	0.225105	0.51	0.51	1.16146e-21
hs-CRP	0.23	0.26	0.26	1.1736e-07	0.28	0.28	0.00685498	0.23	0.23	3.21402e-05
IG	0.05	0.05	0.05	0.27769	0.16	0.16	0.114632	0.05	0.05	0.365022
IG%	0.02	0.03	0.03	0.593865	0.14	0.14	0.189357	0.02	0.02	0.790113
IGF-1	0.57	-0.64	0.64	5.47669e-47	-0.74	0.74	1.11979e-17	-0.57	0.57	2.56513e-28
IL-6	0.01	0.01	0.01	0.858292	0.15	0.15	0.142225	-0.03	0.03	0.615225
Insulin	0.04	0.04	0.04	0.421409	-0.2	0.2	0.0492387	0.13	0.13	0.0245677
Iron	0.03	-0.03	0.03	0.585886	-0.28	0.28	0.00684288	0.11	0.11	0.0448809
Klotho	0.01	0.01	0.01	0.842366	0.15	0.15	0.155555	-0.08	0.08	0.144695
Leptin	0.02	0.12	0.12	0.0135618	0.02	0.02	0.830169	0.11	0.11	0.0588317
LYM	0.01	0.01	0.01	0.816227	-0.07	0.07	0.505878	0.04	0.04	0.438147
LYM%	0.02	-0.06	0.06	0.218282	-0.24	0.24	0.0212362	-0.02	0.02	0.752225
MCH	0.03	0.06	0.06	0.198384	0.03	0.03	0.781347	0.12	0.12	0.0390434
MCHC	0.06	-0.06	0.06	0.267305	-0.34	0.34	0.000841009	0.08	0.08	0.166914
MCV	0.12	0.14	0.14	0.00580182	0.23	0.23	0.0233762	0.12	0.12	0.0294706
MMP-9	0.08	-0.1	0.1	0.0368479	0.08	0.08	0.438502	-0.16	0.16	0.0050473
MONO	0.16	0.16	0.16	0.00118619	0.4	0.4	8.85183e-05	0.18	0.18	0.0015515
MONO%	0.12	0.12	0.12	0.0156872	0.22	0.22	0.0321725	0.16	0.16	0.00408701
MPV	0.14	0.16	0.16	0.00181503	0.16	0.16	0.126955	0.14	0.14	0.014173
NEU	0.03	0.05	0.05	0.312991	0.17	0.17	0.110084	0.03	0.03	0.655394
NEU%	0.02	0.02	0.02	0.624166	0.16	0.16	0.119936	-0.02	0.02	0.675765
NK cells (CD3-CD16+CD56+)	0.05	0.18	0.18	0.000397749	-0.05	0.05	0.640642	0.3	0.3	5.6372e-08
NK cells (CD3-CD8+)	0.25	0.46	0.46	6.01886e-22	0.25	0.25	0.015989	0.48	0.48	2.69703e-19
NK count (CD3-CD16+CD56+)	0.07	0.15	0.15	0.00207167	-0.07	0.07	0.523361	0.26	0.26	2.50227e-06
NK count (CD3-CD8+)	0.23	0.42	0.42	5.40654e-19	0.23	0.23	0.0275676	0.45	0.45	1.27949e-16
NKT cells (CD3+CD16+56+)	0.23	0.32	0.32	7.71197e-11	0.23	0.23	0.0284073	0.32	0.32	1.47407e-08
NKT count (CD3+CD16+56+)	0.19	0.3	0.3	1.66705e-09	0.19	0.19	0.0698806	0.3	0.3	9.88708e-08
NSE	0	-0.1	0.1	0.0430354	-0.23	0.23	0.029331	0	0	0.97978
NT-proBNP	0.61	0.69	0.69	7.22081e-57	0.75	0.75	3.16937e-18	0.61	0.61	6.47681e-33
PCT	0.09	-0.09	0.09	0.0673763	-0.2	0.2	0.0576385	-0.14	0.14	0.015769
PDW	0.04	0.04	0.04	0.434568	0.16	0.16	0.122539	0.1	0.1	0.0758807
PLT	0.16	-0.16	0.16	0.00103424	-0.31	0.31	0.00241337	-0.2	0.2	0.000433621
Progesterone	0.27	-0.38	0.38	2.14077e-15	-0.27	0.27	0.00960018	-0.43	0.43	3.08581e-15
RBC	0.07	-0.26	0.26	1.28205e-07	-0.41	0.41	4.85538e-05	-0.07	0.07	0.24852
RDW	0.18	0.22	0.22	5.80928e-06	0.22	0.22	0.033159	0.18	0.18	0.00129588
SDMA	0.23	0.31	0.31	2.84433e-10	0.23	0.23	0.0260572	0.34	0.34	5.18276e-10
SHBG	0.02	0.21	0.21	1.68684e-05	0.43	0.43	1.35671e-05	0.02	0.02	0.790174
T cell count (CD3+)	0.02	-0.02	0.02	0.673095	-0.04	0.04	0.675876	-0.02	0.02	0.67988
T cell subsets	0.02	0.08	0.08	0.110207	0.18	0.18	0.0763508	-0.02	0.02	0.730365
T cells (CD3+)	0.06	-0.06	0.06	0.223315	0.11	0.11	0.272921	-0.17	0.17	0.00247209
T3	0.02	-0.17	0.17	0.000666004	-0.46	0.46	3.93304e-06	0.02	0.02	0.702098
TBNK lymphocytes	0	-0.05	0.05	0.346169	0	0	0.980339	-0.08	0.08	0.17155
Total bilirubin	0.02	-0.1	0.1	0.0507573	-0.19	0.19	0.0708414	0.02	0.02	0.686195
TSH	0.09	0.11	0.11	0.0242894	0.09	0.09	0.391973	0.1	0.1	0.0697652
Urea	0.37	0.4	0.4	3.50312e-17	0.37	0.37	0.000292727	0.49	0.49	5.24815e-20
Uric acid	0.1	0.11	0.11	0.0213913	-0.1	0.1	0.338629	0.33	0.33	3.40621e-09
vWF	0.14	0.18	0.18	0.000197611	0.3	0.3	0.00356853	0.14	0.14	0.0142439
WBC	0.06	0.07	0.07	0.190235	0.15	0.15	0.145379	0.06	0.06	0.330408
Zonulin	0.37	-0.48	0.48	7.33179e-25	-0.37	0.37	0.000216549	-0.49	0.49	5.48483e-20

## Sheet: ST1C VIFs blood predictors
Males
Term	VIF	VIF_CI_low	VIF_CI_high	SE_factor	Tolerance	Tolerance_CI_low	Tolerance_CI_high
DHEAS	1.3651	1.15507	1.85959	1.16838	0.732546	0.537752	0.865747
HbA1c	1.21543	1.06488	1.71534	1.10247	0.822753	0.582975	0.939074
IGF-1	1.3875	1.16937	1.8866	1.17792	0.720718	0.530053	0.855165
NT-proBNP	1.75217	1.41213	2.37274	1.32369	0.570722	0.421454	0.708148
Free testosterone	1.16705	1.03946	1.70721	1.0803	0.856859	0.585752	0.962037
Cystatin_C	1.98595	1.5719	2.69978	1.40924	0.503537	0.370401	0.636173
hs-CRP	1.23225	1.07433	1.72574	1.11007	0.811522	0.579461	0.930816
Females
Term	VIF	VIF_CI_low	VIF_CI_high	SE_factor	Tolerance	Tolerance_CI_low	Tolerance_CI_high
Homocysteine	1.41735	1.25972	1.67064	1.19052	0.705542	0.598574	0.793824
Cystatin_C	2.1491	1.84308	2.56621	1.46598	0.46531	0.38968	0.542571
IGF-1	1.28957	1.16077	1.52153	1.13559	0.775454	0.657232	0.861494
DHEAS	1.40912	1.25328	1.66084	1.18706	0.709662	0.602104	0.797904
Urea	1.5617	1.37357	1.84458	1.24968	0.640326	0.542129	0.728029
Glucose	1.12172	1.04043	1.36647	1.05911	0.891485	0.731814	0.96114
Zonulin	1.1138	1.03554	1.36442	1.05537	0.897823	0.73291	0.96568

## Sheet: ST1D Species correlations
	Whole			Males			Females
Species Name (NCBI ID)	corr	corr_abs	pvalue	corr	corr_abs	pvalue	corr	corr_abs	pvalue
Acholeplasma axanthum (sp_29552)	0	0	0.952544	0.29	0.29	0.0220974	-0.09	0.09	0.176371
Akkermansia muciniphila (sp_239935)	0.11	0.11	0.0784979	0.07	0.07	0.582306	0.12	0.12	0.0807858
Alistipes onderdonkii (sp_328813)	-0.08	0.08	0.198287	-0.07	0.07	0.612697	-0.09	0.09	0.184378
Alistipes putredinis (sp_28117)	-0.03	0.03	0.562932	-0.2	0.2	0.129183	0.01	0.01	0.855924
Alistipes shahii (sp_328814)	0.03	0.03	0.582224	-0.04	0.04	0.763477	0.05	0.05	0.47509
Allisonella histaminiformans (sp_209880)	-0.05	0.05	0.426686	-0.11	0.11	0.402814	-0.02	0.02	0.804249
Anaerobacterium chartisolvens (sp_1297424)	0.03	0.03	0.628575	0.1	0.1	0.432979	0.01	0.01	0.881285
Anaerobutyricum hallii (sp_39488)	-0.21	0.21	0.000468182	-0.21	0.21	0.105215	-0.2	0.2	0.00342
Anaeromassilibacillus senegalensis (sp_1673717)	0.03	0.03	0.651847	-0.03	0.03	0.813467	0.05	0.05	0.493852
Anaerostipes hadrus (sp_649756)	-0.04	0.04	0.49478	0.12	0.12	0.343851	-0.08	0.08	0.213047
Anaerotignum faecicola (sp_2358141)	-0.07	0.07	0.224412	-0.16	0.16	0.206952	-0.03	0.03	0.61796
Anaerotruncus rubiinfantis (sp_1720200)	0.09	0.09	0.131527	-0.1	0.1	0.434373	0.13	0.13	0.0526175
Bacteroidales bacterium CF (sp_1400053)	0.03	0.03	0.567022	0.01	0.01	0.924752	0.06	0.06	0.415895
Bacteroides caccae (sp_47678)	-0.01	0.01	0.913782	-0.22	0.22	0.0891395	0.05	0.05	0.44839
Bacteroides cellulosilyticus (sp_246787)	0	0	0.993363	0.09	0.09	0.487084	-0.05	0.05	0.455751
Bacteroides eggerthii (sp_28111)	0.04	0.04	0.48628	-0.07	0.07	0.608651	0.07	0.07	0.272548
Bacteroides fragilis (sp_817)	0.02	0.02	0.791059	0.11	0.11	0.391395	-0.01	0.01	0.869393
Bacteroides ovatus (sp_28116)	-0.07	0.07	0.276098	-0.06	0.06	0.641032	-0.07	0.07	0.314957
Bacteroides stercoris (sp_46506)	-0.11	0.11	0.0774863	-0.4	0.4	0.00133125	-0.03	0.03	0.696688
Bacteroides thetaiotaomicron (sp_818)	0.04	0.04	0.485684	-0.2	0.2	0.121381	0.08	0.08	0.210416
Bacteroides uniformis (sp_820)	0.04	0.04	0.460231	-0.02	0.02	0.903365	0.05	0.05	0.446544
Bacteroides xylanisolvens (sp_371601)	0.08	0.08	0.179	0.08	0.08	0.536014	0.06	0.06	0.407613
Barnesiella intestinihominis (sp_487174)	-0.09	0.09	0.135394	-0.02	0.02	0.880612	-0.1	0.1	0.152223
Bifidobacterium adolescentis (sp_1680)	-0.1	0.1	0.0843712	-0.14	0.14	0.284733	-0.1	0.1	0.158681
Blautia coccoides (sp_1532)	-0.1	0.1	0.110874	-0.19	0.19	0.145789	-0.03	0.03	0.690358
Blautia faecis (sp_871665)	0.01	0.01	0.821474	-0.08	0.08	0.538436	0.03	0.03	0.607481
Blautia glucerasea (sp_536633)	-0.05	0.05	0.441594	-0.22	0.22	0.0949891	-0.01	0.01	0.891573
Blautia luti (sp_89014)	-0.23	0.23	7.02478e-05	-0.29	0.29	0.0238584	-0.2	0.2	0.00337172
Blautia obeum (sp_40520)	-0.24	0.24	4.14527e-05	-0.26	0.26	0.0407281	-0.21	0.21	0.00135563
Blautia producta (sp_33035)	-0.26	0.26	1.49573e-05	-0.29	0.29	0.0212732	-0.23	0.23	0.000613298
Blautia sp. SC05B48 (sp_2479767)	-0.26	0.26	1.19301e-05	-0.33	0.33	0.00852088	-0.23	0.23	0.00056633
Blautia wexlerae (sp_418240)	-0.26	0.26	8.1075e-06	-0.36	0.36	0.00499291	-0.2	0.2	0.00275376
Breznakia pachnodae (sp_265178)	0.02	0.02	0.758328	0.21	0.21	0.103486	-0.04	0.04	0.567732
Butyricicoccus faecihominis (sp_1712515)	-0.07	0.07	0.245469	-0.15	0.15	0.255439	-0.02	0.02	0.728095
Butyricicoccus pullicaecorum (sp_501571)	-0.14	0.14	0.0154952	0.08	0.08	0.542904	-0.21	0.21	0.00206574
Butyricimonas virosa (sp_544645)	-0.06	0.06	0.30285	-0.29	0.29	0.0231419	0.01	0.01	0.886526
Butyrivibrio crossotus (sp_45851)	0.11	0.11	0.0624631	0.34	0.34	0.00768036	0.04	0.04	0.60191
Caproiciproducens sp. NJN-50 (sp_2507162)	-0.03	0.03	0.640921	0.12	0.12	0.339516	-0.09	0.09	0.202794
Catabacter hongkongensis (sp_270498)	0.14	0.14	0.0162172	0.33	0.33	0.0104733	0.1	0.1	0.153391
Catenibacterium mitsuokai (sp_100886)	-0.05	0.05	0.358896	0.04	0.04	0.731905	-0.08	0.08	0.216053
Caulobacter henricii (sp_69395)	0.21	0.21	0.000402074	0.21	0.21	0.103972	0.21	0.21	0.0019624
Christensenella massiliensis (sp_1805714)	0.09	0.09	0.117089	0.18	0.18	0.167495	0.04	0.04	0.576628
Christensenella minuta (sp_626937)	0.1	0.1	0.0941809	0.24	0.24	0.0634143	0.04	0.04	0.604628
Christensenella sp. Marseille-P3954 (sp_2086585)	0.07	0.07	0.260865	0.1	0.1	0.427158	0.05	0.05	0.431149
Christensenella timonensis (sp_1816678)	0.04	0.04	0.541841	0.25	0.25	0.0528709	-0.03	0.03	0.612585
Clostridiales bacterium (sp_1898207)	0.09	0.09	0.113394	0.29	0.29	0.0217162	0.04	0.04	0.524601
Clostridiales bacterium CCNA10 (sp_2109688)	-0.1	0.1	0.0972128	0.08	0.08	0.550937	-0.16	0.16	0.0163149
Clostridium colinum (sp_36835)	0.11	0.11	0.0560372	-0.12	0.12	0.342276	0.14	0.14	0.033423
Clostridium leptum (sp_1535)	-0.15	0.15	0.00937673	0.07	0.07	0.5733	-0.21	0.21	0.00165799
Clostridium merdae (sp_1958780)	0.09	0.09	0.125076	0.25	0.25	0.0527008	0.04	0.04	0.506911
Clostridium saudiense (sp_1414720)	0.13	0.13	0.0339383	0.36	0.36	0.0042374	0.06	0.06	0.382038
Clostridium sp. BNL1100 (sp_755731)	0.07	0.07	0.210673	0.15	0.15	0.246337	0.05	0.05	0.486032
Clostridium sporogenes (sp_1509)	-0.01	0.01	0.921086	-0.05	0.05	0.728722	0.03	0.03	0.687069
Colidextribacter massiliensis (sp_1870986)	0.01	0.01	0.804936	0.2	0.2	0.129824	-0.04	0.04	0.581779
Coprococcus catus (sp_116085)	-0.01	0.01	0.897445	0.14	0.14	0.276513	-0.05	0.05	0.441064
Coprococcus comes (sp_410072)	-0.21	0.21	0.000326447	-0.36	0.36	0.00421507	-0.15	0.15	0.0238663
Coprococcus eutactus (sp_33043)	0	0	0.966709	-0.07	0.07	0.569444	0.04	0.04	0.579406
Cuneatibacter caecimuris (sp_1796618)	0.16	0.16	0.00842406	0.21	0.21	0.102256	0.15	0.15	0.028413
Desulfovibrio desulfuricans (sp_876)	0.16	0.16	0.0068644	0.12	0.12	0.375834	0.17	0.17	0.0105687
Desulfovibrio piger (sp_901)	0.06	0.06	0.346609	0.17	0.17	0.20301	0.02	0.02	0.751631
Desulfovibrio vulgaris (sp_881)	-0.03	0.03	0.640177	-0.27	0.27	0.0350736	0.02	0.02	0.773119
Dialister hominis (sp_2582419)	0.03	0.03	0.608221	-0.03	0.03	0.805423	0.07	0.07	0.315033
Dialister invisus (sp_218538)	-0.13	0.13	0.0291405	-0.2	0.2	0.120114	-0.11	0.11	0.0904438
Dialister massiliensis (sp_2161821)	0.08	0.08	0.190675	0.05	0.05	0.689392	0.1	0.1	0.155061
Dialister succinatiphilus (sp_487173)	0.08	0.08	0.159405	-0.07	0.07	0.602013	0.11	0.11	0.0941634
Dorea formicigenerans (sp_39486)	-0.19	0.19	0.00162006	-0.32	0.32	0.010623	-0.13	0.13	0.0510373
Dorea longicatena (sp_88431)	-0.09	0.09	0.14442	-0.16	0.16	0.214636	-0.05	0.05	0.481413
Duncaniella sp. B8 (sp_2576606)	0.13	0.13	0.0248638	0.09	0.09	0.469173	0.14	0.14	0.0324173
Duodenibacillus massiliensis (sp_1852381)	0.12	0.12	0.0518385	0.14	0.14	0.297459	0.09	0.09	0.168139
Dysosmobacter welbionis (sp_2093857)	-0.06	0.06	0.351686	-0.03	0.03	0.837387	-0.08	0.08	0.221778
Emergencia timonensis (sp_1776384)	0.03	0.03	0.630292	0.2	0.2	0.121813	-0.03	0.03	0.660843
Enterocloster bolteae (sp_208479)	-0.16	0.16	0.00842841	-0.26	0.26	0.0456873	-0.12	0.12	0.0754938
Erysipelotrichaceae bacterium GAM147 (sp_2109692)	-0.13	0.13	0.0298607	-0.12	0.12	0.371053	-0.15	0.15	0.0283876
Erysipelotrichaceae bacterium I46 (sp_1834207)	-0.02	0.02	0.6791	0.04	0.04	0.751029	-0.05	0.05	0.463631
Escherichia coli (sp_562)	0.09	0.09	0.114136	0.09	0.09	0.514661	0.1	0.1	0.126352
Eubacterium coprostanoligenes (sp_290054)	0.12	0.12	0.0514074	0.05	0.05	0.679135	0.14	0.14	0.0374715
Eubacterium oxidoreducens (sp_1732)	-0.03	0.03	0.567041	-0.12	0.12	0.353089	0	0	0.951713
Eubacterium ramulus (sp_39490)	-0.06	0.06	0.289523	-0.08	0.08	0.525629	-0.05	0.05	0.495615
Eubacterium rectale (sp_39491)	-0.19	0.19	0.00147342	-0.16	0.16	0.215495	-0.2	0.2	0.00238343
Eubacterium ruminantium (sp_42322)	0	0	0.944318	0.02	0.02	0.884166	0	0	0.946304
Eubacterium siraeum (sp_39492)	0.09	0.09	0.12791	0.21	0.21	0.0998829	0.03	0.03	0.649193
Eubacterium ventriosum (sp_39496)	-0.03	0.03	0.581046	0.16	0.16	0.225289	-0.08	0.08	0.218737
Eubacterium xylanophilum (sp_39497)	0.08	0.08	0.174886	0.22	0.22	0.0944946	0.04	0.04	0.542713
Faecalibacterium prausnitzii (sp_853)	-0.02	0.02	0.790623	0.06	0.06	0.640432	-0.05	0.05	0.493515
Faecalicatena contorta (sp_39482)	-0.1	0.1	0.0898257	-0.14	0.14	0.287317	-0.09	0.09	0.173482
Faecalicatena fissicatena (sp_290055)	-0.03	0.03	0.633508	0.12	0.12	0.370989	-0.07	0.07	0.311838
Faecalicatena orotica (sp_1544)	-0.11	0.11	0.0645151	-0.12	0.12	0.35684	-0.13	0.13	0.0545156
Faecalimonas umbilicata (sp_1912855)	-0.27	0.27	5.23475e-06	-0.21	0.21	0.0975484	-0.27	0.27	4.9197e-05
Faecalitalea cylindroides (sp_39483)	-0.06	0.06	0.332024	0.05	0.05	0.68603	-0.1	0.1	0.139724
Flavonifractor plautii (sp_292800)	-0.09	0.09	0.1299	-0.12	0.12	0.360424	-0.09	0.09	0.173665
Flintibacter sp. KGMB00164 (sp_2610895)	-0.14	0.14	0.015553	-0.25	0.25	0.0514365	-0.12	0.12	0.0669807
Fournierella massiliensis (sp_1650663)	-0.14	0.14	0.016994	-0.1	0.1	0.434646	-0.16	0.16	0.0170206
Fusicatenibacter saccharivorans (sp_1150298)	-0.25	0.25	3.01832e-05	-0.27	0.27	0.0387782	-0.23	0.23	0.000646068
Gemmiger formicilis (sp_745368)	-0.21	0.21	0.000423112	-0.21	0.21	0.105826	-0.2	0.2	0.00280949
Haemophilus parainfluenzae (sp_729)	0.06	0.06	0.299282	0.14	0.14	0.266453	0.03	0.03	0.665261
Holdemanella biformis (sp_1735)	0.19	0.19	0.00103015	0.16	0.16	0.212711	0.21	0.21	0.00206362
Howardella ureilytica (sp_404403)	0.17	0.17	0.0047617	0.02	0.02	0.885099	0.22	0.22	0.000902947
Hungateiclostridium aldrichii (sp_29353)	-0.06	0.06	0.334369	-0.07	0.07	0.581606	-0.06	0.06	0.393684
Hungateiclostridium alkalicellulosi (sp_320502)	0.01	0.01	0.915269	0.11	0.11	0.404975	-0.01	0.01	0.896663
Hungateiclostridium cellulolyticum (sp_35830)	-0.05	0.05	0.377299	0.01	0.01	0.954642	-0.08	0.08	0.267655
Hungateiclostridium saccincola (sp_1677857)	0	0	0.975519	-0.04	0.04	0.783732	0.02	0.02	0.742057
Hungateiclostridium thermocellum (sp_1515)	-0.04	0.04	0.460176	0.01	0.01	0.94723	-0.07	0.07	0.313914
Hungatella hathewayi (sp_154046)	0.04	0.04	0.475466	0.08	0.08	0.563692	0.06	0.06	0.404208
Hydrogenoanaerobacterium saccharovorans (sp_474960)	-0.15	0.15	0.0143151	-0.22	0.22	0.0882048	-0.12	0.12	0.0874864
Ihubacter massiliensis (sp_1852367)	-0.06	0.06	0.321523	0.1	0.1	0.424502	-0.11	0.11	0.116928
Intestinibacter bartlettii (sp_261299)	0.14	0.14	0.0152765	0.36	0.36	0.00390893	0.09	0.09	0.195876
Intestinimonas butyriciproducens (sp_1297617)	0.05	0.05	0.418064	0.05	0.05	0.695128	0.04	0.04	0.506804
Janthinobacterium agaricidamnosum (sp_55508)	0.22	0.22	0.000226148	0.17	0.17	0.184767	0.23	0.23	0.000602367
Laceyella sacchari (sp_37482)	-0.14	0.14	0.0150886	0.02	0.02	0.85535	-0.19	0.19	0.00505383
Lachnoclostridium sp. YL32 (sp_1834196)	0.13	0.13	0.0337235	0.07	0.07	0.57186	0.15	0.15	0.0272735
Lachnospira eligens (sp_39485)	-0.07	0.07	0.231826	0.13	0.13	0.30195	-0.14	0.14	0.0410411
Lachnospiraceae bacterium Choco86 (sp_2109690)	-0.15	0.15	0.0140161	-0.3	0.3	0.0174687	-0.06	0.06	0.340527
Lachnospiraceae bacterium GAM79 (sp_2109691)	0.09	0.09	0.119856	0.24	0.24	0.0675635	0.03	0.03	0.616515
Lacrimispora algidixylanolytica (sp_94868)	-0.05	0.05	0.438182	-0.12	0.12	0.346495	-0.02	0.02	0.727653
Lacrimispora amygdalina (sp_253257)	-0.08	0.08	0.182774	-0.18	0.18	0.161325	-0.03	0.03	0.632348
Lacrimispora indolis (sp_69825)	0.05	0.05	0.429679	-0.04	0.04	0.74972	0.09	0.09	0.203155
Lacrimispora saccharolytica (sp_84030)	-0.18	0.18	0.00245929	-0.14	0.14	0.287087	-0.18	0.18	0.00839129
Lactobacillus rogosae (sp_706562)	-0.05	0.05	0.422011	-0.07	0.07	0.576318	-0.04	0.04	0.582148
Massiliprevotella massiliensis (sp_1816687)	0.02	0.02	0.701223	0.05	0.05	0.699636	0	0	0.991773
Mediterraneibacter glycyrrhizinilyticus (sp_342942)	-0.12	0.12	0.0398149	0.09	0.09	0.475763	-0.2	0.2	0.00271986
Mogibacterium diversum (sp_114527)	0.18	0.18	0.00253635	0.23	0.23	0.0811355	0.17	0.17	0.00945713
Monoglobus pectinilyticus (sp_1981510)	-0.07	0.07	0.241958	0.09	0.09	0.501549	-0.12	0.12	0.0673043
Muribaculum intestinale (sp_1796646)	0.18	0.18	0.00287689	0.24	0.24	0.0640605	0.16	0.16	0.0179617
Negativibacillus massiliensis (sp_1871035)	-0.02	0.02	0.751658	0.12	0.12	0.369289	-0.05	0.05	0.477581
Neglecta timonensis (sp_1776382)	0.04	0.04	0.49327	0.11	0.11	0.414845	0.02	0.02	0.761265
Odoribacter splanchnicus (sp_28118)	-0.04	0.04	0.505922	-0.09	0.09	0.484803	-0.01	0.01	0.828527
Oscillibacter sp. PEA192 (sp_2109687)	-0.09	0.09	0.122911	-0.14	0.14	0.278053	-0.1	0.1	0.134172
Oscillibacter valericigenes (sp_351091)	0.07	0.07	0.245784	0.11	0.11	0.414478	0.04	0.04	0.579836
Oxalobacter formigenes (sp_847)	-0.09	0.09	0.15386	-0.07	0.07	0.567243	-0.07	0.07	0.275395
Papillibacter cinnamivorans (sp_100176)	0.11	0.11	0.0607482	0.22	0.22	0.095474	0.06	0.06	0.395166
Parabacteroides distasonis (sp_823)	0	0	0.969146	-0.09	0.09	0.510983	0.03	0.03	0.688436
Parabacteroides merdae (sp_46503)	0.01	0.01	0.883547	-0.04	0.04	0.778403	0.02	0.02	0.776795
Parabacteroides sp. CT06 (sp_2025876)	0.09	0.09	0.113697	-0.04	0.04	0.759038	0.11	0.11	0.107299
Paraprevotella clara (sp_454154)	-0.11	0.11	0.0779987	-0.12	0.12	0.34129	-0.1	0.1	0.127499
Parasutterella excrementihominis (sp_487175)	-0.16	0.16	0.00758551	-0.22	0.22	0.0931329	-0.13	0.13	0.0469117
Peptococcus niger (sp_2741)	-0.05	0.05	0.435759	-0.03	0.03	0.796823	-0.05	0.05	0.425093
Phascolarctobacterium faecium (sp_33025)	-0.18	0.18	0.00210376	-0.25	0.25	0.0501971	-0.18	0.18	0.00812471
Phascolarctobacterium succinatutens (sp_626940)	0.06	0.06	0.323886	0.23	0.23	0.0694274	0.02	0.02	0.776205
Phocaeicola dorei (sp_357276)	-0.09	0.09	0.14422	-0.17	0.17	0.201951	-0.07	0.07	0.317412
Phocaeicola massiliensis (sp_204516)	0	0	0.957167	0	0	0.997997	0.01	0.01	0.887763
Phocaeicola plebeius (sp_310297)	-0.04	0.04	0.517817	-0.24	0.24	0.060597	0.02	0.02	0.723884
Phocaeicola vulgatus (sp_821)	-0.01	0.01	0.874239	-0.15	0.15	0.242682	0.01	0.01	0.885295
Phocea massiliensis (sp_1841867)	-0.28	0.28	1.67897e-06	-0.4	0.4	0.00124582	-0.23	0.23	0.000660714
Prevotella copri (sp_165179)	0.02	0.02	0.795166	-0.09	0.09	0.513209	0.05	0.05	0.442827
Prevotella stercorea (sp_363265)	0.11	0.11	0.0657553	0.17	0.17	0.201727	0.08	0.08	0.235132
Prevotellamassilia timonensis (sp_1852370)	0.06	0.06	0.339587	0.15	0.15	0.262806	0.03	0.03	0.712077
Pseudoclostridium thermosuccinogenes (sp_84032)	0.12	0.12	0.0396305	0.01	0.01	0.968886	0.15	0.15	0.0255433
Pseudoflavonifractor phocaeensis (sp_1870988)	-0.07	0.07	0.264513	-0.04	0.04	0.73078	-0.1	0.1	0.143946
Romboutsia timonensis (sp_1776391)	-0.14	0.14	0.0212586	-0.09	0.09	0.47294	-0.15	0.15	0.0230459
Roseburia faecis (sp_301302)	0.04	0.04	0.553667	0.05	0.05	0.676944	0.04	0.04	0.539383
Roseburia hominis (sp_301301)	0	0	0.975406	0.02	0.02	0.855997	-0.01	0.01	0.880929
Roseburia intestinalis (sp_166486)	-0.07	0.07	0.211232	-0.13	0.13	0.335301	-0.05	0.05	0.490252
Roseburia inulinivorans (sp_360807)	-0.02	0.02	0.757024	-0.06	0.06	0.643101	-0.01	0.01	0.867222
Ruminiclostridium cellobioparum (sp_29355)	-0.06	0.06	0.294346	-0.06	0.06	0.650317	-0.07	0.07	0.327234
Ruminococcus albus (sp_1264)	0.14	0.14	0.0224902	0.33	0.33	0.00856565	0.07	0.07	0.288389
Ruminococcus bicirculans (sp_1160721)	-0.01	0.01	0.83135	-0.06	0.06	0.669734	0.01	0.01	0.937797
Ruminococcus bromii (sp_40518)	-0.04	0.04	0.503308	-0.08	0.08	0.560807	-0.04	0.04	0.581911
Ruminococcus callidus (sp_40519)	-0.2	0.2	0.00101417	-0.27	0.27	0.0327686	-0.18	0.18	0.00609463
Ruminococcus champanellensis (sp_1161942)	0.13	0.13	0.0361343	0.29	0.29	0.0255611	0.06	0.06	0.408875
Ruminococcus faecis (sp_592978)	-0.11	0.11	0.0716747	-0.29	0.29	0.0245118	-0.04	0.04	0.531469
Ruminococcus gnavus (sp_33038)	-0.05	0.05	0.38354	0.05	0.05	0.680734	-0.06	0.06	0.356224
Ruminococcus lactaris (sp_46228)	-0.1	0.1	0.0949856	-0.13	0.13	0.328076	-0.08	0.08	0.214585
Ruminococcus sp. JE7A12 (sp_2564099)	-0.02	0.02	0.769614	-0.08	0.08	0.534726	0	0	0.984808
Ruminococcus torques (sp_33039)	-0.03	0.03	0.604568	-0.11	0.11	0.38674	-0.02	0.02	0.715017
Ruthenibacterium lactatiformans (sp_1550024)	-0.05	0.05	0.432859	-0.09	0.09	0.509124	-0.04	0.04	0.59736
Sporobacter termitidis (sp_44749)	0.11	0.11	0.0674754	0.2	0.2	0.130614	0.08	0.08	0.23314
Streptococcus salivarius (sp_1304)	0.04	0.04	0.537168	0.13	0.13	0.309944	0.02	0.02	0.809672
Streptococcus thermophilus (sp_1308)	0.01	0.01	0.879631	0.06	0.06	0.625365	-0.02	0.02	0.73198
Sutterella faecalis (sp_2584944)	0.05	0.05	0.402233	-0.03	0.03	0.83471	0.07	0.07	0.302869
Sutterella massiliensis (sp_1816689)	0.01	0.01	0.852765	0.16	0.16	0.206556	-0.03	0.03	0.655249
Sutterella wadsworthensis (sp_40545)	-0.17	0.17	0.00340181	-0.36	0.36	0.00490995	-0.11	0.11	0.109917
Vampirovibrio chlorellavorus (sp_758823)	0.01	0.01	0.855173	-0.05	0.05	0.699974	0.01	0.01	0.834574
Variovorax paradoxus (sp_34073)	0.18	0.18	0.00200611	0.17	0.17	0.184767	0.19	0.19	0.00562309
Veillonella parvula (sp_29466)	0.16	0.16	0.00733675	0.25	0.25	0.05085	0.12	0.12	0.0743598
Victivallales bacterium CCUG 44730 (sp_2094242)	0.05	0.05	0.410298	0.3	0.3	0.0185091	-0.02	0.02	0.776834

## Sheet: ST1E VIFs species predictors
Term	VIF	VIF_CI_low	VIF_CI_high	SE_factor	Tolerance	Tolerance_CI_low	Tolerance_CI_high
sp_39488	1.84756	1.62291	2.15325	1.35925	0.541253	0.464415	0.616179
sp_89014	3.89991	3.31077	4.63925	1.97482	0.256416	0.215552	0.302045
sp_40520	1.73572	1.5314	2.01861	1.31747	0.57613	0.495391	0.652999
sp_33035	2.1902	1.90398	2.56705	1.47993	0.456579	0.389551	0.525216
sp_2479767	2.07415	1.8087	2.42675	1.44019	0.482124	0.412074	0.552884
sp_418240	3.6369	3.09421	4.32023	1.90707	0.274959	0.231469	0.323185
sp_501571	1.23844	1.13087	1.43442	1.11285	0.807468	0.697148	0.884272
sp_270498	1.33267	1.20486	1.54022	1.15441	0.750373	0.649257	0.829973
sp_1535	1.59143	1.41368	1.84556	1.26152	0.628365	0.54184	0.707374
sp_1414720	1.47669	1.32053	1.70891	1.21519	0.677191	0.585167	0.75727
sp_410072	1.47874	1.32219	1.71134	1.21603	0.676253	0.584336	0.75632
sp_1796618	1.30679	1.18434	1.51058	1.14315	0.765236	0.661998	0.844355
sp_876	1.14374	1.06037	1.34223	1.06946	0.874327	0.745028	0.943068
sp_218538	1.10444	1.03404	1.32042	1.05092	0.905434	0.757332	0.967078
sp_39486	1.80786	1.5904	2.10541	1.34457	0.553142	0.474967	0.628774
sp_2576606	1.38644	1.24781	1.60262	1.17747	0.721273	0.623977	0.801407
sp_208479	1.9936	1.7426	2.32944	1.41195	0.501605	0.429288	0.573854
sp_2109692	1.32174	1.19618	1.52767	1.14967	0.756577	0.654592	0.835995
sp_39491	1.28722	1.16891	1.48841	1.13456	0.776868	0.67186	0.8555
sp_1912855	1.71892	1.51766	1.99841	1.31107	0.581762	0.500398	0.658908
sp_2610895	1.39265	1.25279	1.60988	1.1801	0.718058	0.621163	0.79822
sp_1650663	1.16685	1.07694	1.36186	1.08021	0.857005	0.734287	0.92856
sp_1150298	1.83214	1.61028	2.13466	1.35357	0.545809	0.468458	0.62101
sp_745368	1.68844	1.49277	1.96181	1.2994	0.592262	0.509734	0.669894
sp_1735	1.12655	1.0485	1.33019	1.06139	0.887665	0.751775	0.95374
sp_404403	1.24779	1.13811	1.44459	1.11705	0.801414	0.692238	0.87865
sp_474960	1.40488	1.26261	1.62422	1.18528	0.711805	0.615681	0.792008
sp_261299	2.19902	1.91122	2.57772	1.48291	0.454748	0.38794	0.523226
sp_37482	1.14303	1.05987	1.34169	1.06913	0.874865	0.74533	0.943508
sp_1834196	1.50276	1.34165	1.73986	1.22587	0.665441	0.57476	0.745352
sp_2109690	1.72263	1.52069	2.00287	1.31249	0.580509	0.499285	0.657594
sp_84030	1.91489	1.67806	2.23443	1.38379	0.522224	0.447542	0.595926
sp_342942	1.16325	1.07432	1.35862	1.07854	0.859659	0.736043	0.930824
sp_114527	1.28796	1.16949	1.48924	1.13488	0.77642	0.671481	0.855073
sp_1796646	1.41395	1.26991	1.63487	1.1891	0.707238	0.611671	0.787459
sp_487175	1.64637	1.45844	1.91133	1.28311	0.607398	0.523196	0.685664
sp_33025	1.18832	1.09277	1.38227	1.0901	0.841523	0.723446	0.915102
sp_1841867	1.42154	1.27602	1.64379	1.19228	0.703461	0.60835	0.783688
sp_84032	1.21392	1.11207	1.40832	1.10178	0.823778	0.710068	0.899221
sp_1776391	2.38903	2.06735	2.80766	1.54565	0.41858	0.356169	0.483711
sp_1264	1.2491	1.13912	1.44601	1.11763	0.800579	0.691557	0.877872
sp_40519	1.27183	1.15684	1.47115	1.12776	0.786267	0.679741	0.864427
sp_1161942	1.73993	1.53484	2.02367	1.31906	0.574736	0.494153	0.651535
sp_40545	1.28903	1.17033	1.49045	1.13536	0.775776	0.670938	0.854458
sp_29466	1.09832	1.03025	1.31957	1.04801	0.910483	0.757822	0.97064

## Sheet: ST1F Predictions
ID	Ch.Age	Sex (0 - female, 1 - male)	PhenoAge	Biochemical model	Microbiome model
pat0981	18	1	20	26	34.5
pat1160	18	0	21	41	41.5
pat0620	19	1	16
pat0635	19	0	14
pat0776	19	1	17	25
pat1123	19	1	18	26	30.5
pat1128	19	1	27	29
pat1151	19	1	17	24
pat0671	20	0	30	22	28
pat0889	20	0	14	20
pat0986	20	0	20	22
pat1120	20	0	17		32.5
pat0631	21	0	20
pat0670	21	1	19	29
pat1115	21	1	23
pat0543	22	0	46	32
pat0563	22	0	22		30
pat0576	22	1	17	25	32.5
pat0666	22	1	19	25	32
pat0870	22	1	18	35
pat0905	22	0	23	42
pat0910	22	0	23	32
pat0972	22	0	22	28
pat1114	22	0	16	34
pat1118	22	0	18		37.5
pat1125	22	0	17	25
pat1144	22	0	30
pat1147	22	1	25	30
pat0079	23	0			30.5
pat0535	23	0	19	22	29.5
pat0567	23	0	19	25
pat0568	23	0	17	35	33
pat0626	23	0	18
pat0632	23	0	23
pat0634	23	0	23
pat0652	23	0	30	23	31
pat0668	23	1	18	26	39.5
pat0794	23	0	33	28	33.5
pat0896	23	0	21
pat1113	23	0	19	34	44
pat1117	23	0	33
pat1126	23	1	20	31
pat1185	23	0	20
pat0062	24	0	26		31.5
pat0142	24	0	28	34	24
pat0562	24	1	25	29	29.5
pat0572	24	0	22	30	30.5
pat0804	24	0	28	47	31.5
pat0895	24	0	19	29	31
pat1122	24	0	19
pat1124	24	0	21	28	43.5
pat0512	25	1	23		30.5
pat0526	25	0	24		29
pat0569	25	1	29	25	29
pat0659	25	0	31	49	29.5
pat1119	25	0	29		30.5
pat1121	25	0	14
pat1159	25	1	28	28
pat0172	26	0	20	31
pat0527	26	1	22	30	30
pat0549	26	1	24
pat0609	26	0	25	33	30.5
pat0633	26	1	25	25	31.5
pat0672	26	0	19	37
pat0914	26	0	26
pat0922	26	1	25	40	33
pat0929	26	1	27	30
pat1068	26	0			31.5
pat0046	27	0	20		31.5
pat0169	27	0	23		31
pat0515	27	1	27		33
pat0529	27	1	26		34
pat0545	27	0	24
pat0604	27	0	24	24	33
pat0607	27	1	30	29	34
pat0813	27	1	27	25
pat1178	27	0	24		50
pat0011	28	0	25		39
pat0175	28	0	24	33
pat0570	28	1	29	27	31
pat0585	28	1	26	33	32.5
pat0586	28	0	24	25
pat0600	28	1	31	30
pat0606	28	1	26
pat0612	28	1	18	35	40
pat0619	28	0	24		32.5
pat0625	28	0	22	35	32
pat0798	28	1	31	32	34
pat0930	28	1	26	19
pat0941	28	0	30	51	32
pat0975	28	1	29	26	31.5
pat1136	28	1	25		36
pat0171	29	0	19	40	38.5
pat0528	29	0	27		31.5
pat0544	29	1	29	32
pat0581	29	0	23	29	36
pat0583	29	1	29	33	32.5
pat0598	29	0	20	29	33
pat0623	29	1	30	32
pat0630	29	0	35	25	36
pat0755	29	1	31	33
pat0792	29	0	25	47	46
pat0983	29	0	22	34	32.5
pat1116	29	0	22		39.5
pat1135	29	0	22	37	33.5
pat1186	29	0	27	29	45
pat0052	30	0	23
pat0525	30	0	40
pat0534	30	1	26	24
pat0542	30	1	31	41
pat0550	30	0	24	27	44.5
pat0551	30	1	30	35	32.5
pat0561	30	0	31	32	33
pat0574	30	1	32	32	34
pat0657	30	0	27
pat0660	30	1	29	34
pat0871	30	0	23	31	36.5
pat1048	30	0	25	43	38.5
pat0181	31	1	33	48
pat0215	31	0	31	42	38.5
pat0380	31	0	27		35.5
pat0565	31	1	31	38	47.5
pat0573	31	0	25	43	39.5
pat0599	31	0	30	31	35.5
pat0628	31	1	42	51
pat0651	31	0			38.5
pat0669	31	1	27	31	34
pat0674	31	0	29	32
pat0727	31	0	29	36
pat0751	31	1	28	39	41
pat0797	31	1	29	28	36
pat1069	31	1	32	35	32.5
pat0179	32	0	29	38
pat0182	32	0	30		37
pat0521	32	1	26		34
pat0530	32	0	24	30	33
pat0588	32	0	30	33	34
pat0658	32	0	26	28	36
pat0663	32	0	32	35	34.5
pat0664	32	1	31	31	33.5
pat0710	32	1	29	30
pat0750	32	1	30	27
pat0754	32	0	24	30
pat0779	32	0	32	43	37
pat0796	32	1	33
pat0558	33	1	28
pat0575	33	0	34	33	35.5
pat0899	33	0	33	38
pat1082	33	0	31	31
pat0523	34	0	20		29
pat0536	34	1	35	47
pat0538	34	0	26	39	37
pat0547	34	1	30	35	37
pat0552	34	1	32	35	37.5
pat0601	34	0	29
pat0602	34	0	28	34	40
pat0611	34	1	33	31	34.5
pat0616	34	0	34		37.5
pat0675	34	1	36	43	34.5
pat0866	34	1	35	53	34.5
pat0869	34	0	30	33	41
pat0517	35	0	31		45.5
pat0520	35	0	31
pat0532	35	1	33	34	35.5
pat0638	35	1	33		37.5
pat0641	35	0	41		35.5
pat0642	35	0	32
pat0644	35	1	29		35
pat0702	35	0	33	36	38.5
pat0728	35	0	32	33
pat0729	35	0	29	36
pat0756	35	0	35	38
pat0818	35	0	31	28
pat0897	35	0	30	33	36.5
pat1177	35	0	37		40
pat0054	36	0	34		38
pat0065	36	0	32		41
pat0318	36	0	33		37
pat0516	36	0	26		36.5
pat0537	36	0	35	37	37
pat0564	36	0	37	46
pat0865	36	0	44	37	37
pat1188	36	0	27
pat0319	37	0	36	34	40.5
pat0524	37	1	38
pat0577	37	0	36
pat0589	37	0	35	39	40
pat0655	37	0	42	37	36
pat0673	37	0	36	39	36
pat0734	37	1	32	48	39
pat0857	37	0	41	53	38
pat0137	38	0	31	42	36.5
pat0519	38	0	34	37	40.5
pat0541	38	0	39	54
pat0548	38	0	30	27	46.5
pat0554	38	0	39	37	38.5
pat0571	38	0	35	31	38.5
pat0584	38	0	40	37	37
pat0594	38	1	33	27	38.5
pat0667	38	1	43	53	38
pat0901	38	0	32	38	47
pat1176	38	0	35	47
pat0522	39	0	34		39.5
pat0557	39	1	32	39	38.5
pat0603	39	1	47		45.5
pat0647	39	0	48	43
pat0700	39	0	34	34
pat0735	39	0	35	40	41.5
pat0737	39	0	35
pat0763	39	0	31	59
pat0012	40	0	40	39
pat0540	40	0	37	42	47.5
pat0578	40	1	35	44	38.5
pat0605	40	0	33	34
pat0686	40	0	54	47	40
pat0691	40	0	40	49
pat0693	40	0	34	47
pat0705	40	1	39	47	41
pat0717	40	0	33	50	43.5
pat0739	40	0	39	31
pat0789	40	0	58	48	40
pat0823	40	0	40
pat0856	40	1	44	31
pat1183	40	1	40	33	37.5
pat0553	41	0	37	30	49.5
pat0580	41	0	32	39	40.5
pat0593	41	0	36	42	42
pat0622	41	1	36	45	42.5
pat0629	41	1	38	39	41
pat0680	41	0	41	36	42
pat0695	41	0	43	42	43
pat0696	41	1	40	38
pat0709	41	0	40	48	42
pat0730	41	0	39	46
pat0790	41	0	34	56
pat0800	41	0	38	30	41
pat0881	41	0	30	38	48
pat1127	41	0	35	46
pat0579	42	1	40	33
pat0617	42	0	67
pat0679	42	0	47	35	42
pat0681	42	0	56	50	41
pat0708	42	0	59	59
pat0801	42	0	35
pat0838	42	0	38	53	51
pat0882	42	0	39
pat1179	42	1	45		45
pat1193	42	0	36
pat0203	43	0	31	43	41.5
pat0665	43	1	41	41	43
pat0682	43	0	40	35	43.5
pat0703	43	1	46	37	45
pat0716	43	0	50	42	39
pat0720	43	0	46
pat0733	43	0	42	44	40.5
pat0743	43	1	45	32
pat0752	43	1	46	34
pat0920	43	0	37	52	47.5
pat0486	44	1	45	52	41.5
pat0711	44	1	47	41
pat0839	44	0	34	62	54
pat0608	45	0	34	46	44.5
pat0640	45	1	46		40
pat0694	45	0	37	48
pat0719	45	1	45	49
pat0764	45	0	45	43
pat0799	45	0	41	41	42
pat0837	45	0	48	52	47.5
pat0907	45	0	44	51	46
pat0533	46	0	46	40	41.5
pat0546	46	0	44	61	56.5
pat0582	46	0	50
pat0614	46	0	50	36
pat0615	46	1	48
pat0624	46	1	50	44	41
pat0690	46	0	44	48
pat0701	46	0	43	37
pat0742	46	0	39	47
pat0788	46	0	42	60
pat0817	46	0	36
pat0867	46	1	39
pat0877	46	0	40	43	54.5
pat0970	46	0	45		57.5
pat0980	46	1	43	42	43.5
pat0390	47	0	53		42.5
pat0590	47	0	43	41	43.5
pat0591	47	0	47	53	54.5
pat0610	47	0	43	47	44.5
pat0685	47	0	53	57	44
pat0689	47	0	45	43	47.5
pat0697	47	0	50	38	52
pat0707	47	0	49	59	44
pat0753	47	0	52	36
pat0637	48	0	40		53.5
pat0649	48	0	42	49	48
pat0656	48	1	54	36	42
pat0676	48	0	49	41	50.5
pat0678	48	0	41	37	44
pat0692	48	0	46	50	42.5
pat0706	48	0	53	46	42.5
pat0721	48	0	47	50	46.5
pat0770	48	0	45	56
pat0555	49	0	49	52	46.5
pat0597	49	0	46	45	43
pat0613	49	0	47	41	48
pat0765	49	0	48	62
pat0787	49	0	57	55	44.5
pat1142	49	0	40		55.5
pat1173	49	0	44	58
pat0408	50	0	43	58
pat0650	50	1	52	43
pat0736	50	0	47	60
pat0738	50	0	42	40
pat0771	50	1	46	53
pat0775	50	0	63	61	47.5
pat0777	50	1	52	50	42.5
pat0947	50	1	51	49	48
pat0956	50	1	63	56
pat0144	51	0	44	48	47.5
pat0531	51	0	42	40	50
pat0556	51	0	50	54	53.5
pat0621	51	1	55	60
pat0654	51	0	50	39
pat0688	51	0	52	61	43
pat0749	51	0	44	61
pat0762	51	0	43	59
pat0768	51	0	42	44
pat0774	51	0	47	54
pat0784	51	0	44
pat0816	51	0	45	39	56
pat0917	51	0	49	65
pat0940	51	0	44	42
pat0949	51	0	51
pat0955	51	0	45	66	58
pat1171	51	0	50	59
pat0518	52	1	48	53
pat0712	52	0	47	51
pat0746	52	1	46	60
pat0759	52	1	48	47
pat0761	52	1	48	52
pat0778	52	1	55		57
pat0846	52	0	47	65	50
pat0849	52	0	49	53	58
pat0852	52	0	54	42	54.5
pat0876	52	0	54	66	55.5
pat0878	52	0	50
pat0950	52	0	45	60	47.5
pat1172	52	1	51		50
pat0514	53	1	48		60.5
pat0653	53	0	52	52	55
pat0698	53	1	49	43
pat0760	53	1	50	42
pat0781	53	1	51		59
pat0884	53	0	50	59
pat0938	53	1	52
pat0959	53	0	44	59	63
pat0966	53	0	52	59
pat0973	53	0	56	45	50
pat0317	54	0	52	52	52
pat0595	54	0	56	48	50
pat0684	54	0	56	51	50
pat0786	54	0	46		55
pat0830	54	0	49	53	53
pat0855	54	0	48	51
pat0875	54	0	43	56	54
pat0912	54	1	48
pat0968	54	1	53	45
pat0559	55	0	52	61	47.5
pat0627	55	0	47	49	48.5
pat0699	55	0	49	50	55.5
pat0718	55	0	53	63	54.5
pat0724	55	1	52	60	50
pat0809	55	0	53	55	55
pat0909	55	1	47	52	45
pat0915	55	0	48
pat0566	56	0	50	58	48
pat0639	56	0	60
pat0648	56	0	53	44	51.5
pat0714	56	0	60	69
pat0745	56	0	49	65
pat0803	56	0	50	57	54
pat0806	56	0	51	48	60
pat0807	56	0	48	46
pat0831	56	0	48	61	47.5
pat0850	56	0	49	49	49.5
pat0913	56	0	51	60	56
pat0918	56	0	54	57
pat1191	56	0	50
pat0643	57	1	53		50
pat0646	57	0	54		50.5
pat0725	57	1	59	45
pat0747	57	0	53	66
pat0748	57	0	53	50
pat0780	57	0	56
pat0858	57	0	48	65	60.5
pat0868	57	1	50	55	53.5
pat0138	58	1	57		58.5
pat0560	58	0	50		61.5
pat0596	58	0	54	63	53.5
pat0645	58	1	62		55
pat0677	58	0	60	49	58
pat0833	58	0	48	58	61.5
pat0864	58	0	53	57	58
pat0887	58	1	59	56
pat0892	58	0	58	50	54
pat1166	58	0	50		48
pat0539	59	1	55	62	59.5
pat0704	59	0	56	61
pat0782	59	0	52	55
pat0862	59	0	47	61
pat0902	59	1	60	61	67
pat0908	59	0	57	62	56.5
pat0924	59	0	53	61	58
pat1168	59	0	58	64
pat1187	59	0	61	61
pat0757	60	0	52	54
pat0767	60	0	56	75
pat0885	60	1	60	67
pat0945	60	0	55	69	65
pat0963	60	1	57	53	62
pat0974	60	0	54	61	63
pat0713	61	0	60	68	49
pat0726	61	0	57	57
pat0732	61	0	55
pat0808	61	0	55	45	60
pat0827	61	0	64	71	52
pat0891	61	0	58	50
pat0937	61	0	55	72
pat0954	61	0	54	50	49
pat0961	61	1	70	62	53.5
pat0587	62	0	53	59	52
pat0773	62	0	59	44
pat0828	62	0	55	60
pat0841	62	0	56	54	64
pat0851	62	1	56	58	58
pat0874	62	0			60.5
pat0880	62	1	54	61	60.5
pat0898	62	0	59	53	63.5
pat0903	62	1	70	45
pat0919	62	0	57
pat0960	62	0	56	49	56.5
pat1095	62	1	66	52	59.5
pat0687	63	0	60	62
pat0766	63	1	56	59
pat0844	63	0	54	66	60
pat0845	63	0	58	60	60.5
pat0847	63	0	52	58	62.5
pat0872	63	0	57	66	60.5
pat0921	63	0	60	63	58.5
pat1094	63	0	61	72	62
pat0795	64	0	61	75	57.5
pat0822	64	0	62	69	58.5
pat0843	64	0	61	66	63
pat0854	64	0	57	75	60.5
pat0859	64	0	58	58	62.5
pat0900	64	0	60	64
pat0904	64	0	57	56	66.5
pat0916	64	0	59	51	60.5
pat0927	64	0	61	55
pat0928	64	0	62	62
pat0933	64	0	60	76	67
pat0936	64	0	54	64	55.5
pat0939	64	0	57	68	65
pat0944	64	0	65	66	65.5
pat1092	64	0	63		64.5
pat0715	65	0	66	76	55
pat0741	65	0	54	61
pat0848	65	0	55	51
pat0879	65	0	60	56	82.5
pat0883	65	0	62	56	56
pat0911	65	0	64	69
pat0957	65	0	70	68
pat0723	66	0	65	70	63.5
pat0810	66	0	63	68
pat0811	66	0	59	56	56
pat0888	66	1	66	58	68
pat0906	66	1	64	56
pat0926	66	1	66	71	63
pat0934	66	0	63	63	60.5
pat0935	66	0	60	60	66.5
pat0948	66	0	62	73	60.5
pat1084	66	0	77	76	62
pat1164	66	0	61		64
pat1170	66	0	57	58
pat0513	67	0	66		63
pat0661	67	0	78	60	57.5
pat0758	67	0	64
pat0769	67	0	64	53
pat0821	67	0	57		66
pat0825	67	0	65	54	64.5
pat0829	67	0	59	63	66
pat0923	67	0	63		58.5
pat0992	67	0			66
pat1146	67	0	65	69	70.5
pat1157	67	0	63	71
pat0683	68	0	69	68	62.5
pat0812	68	0	63	68	55.5
pat0826	68	1	71	64	61
pat0834	68	0	57	62	60
pat0842	68	1	66	66	65.5
pat0860	68	0	58	79	68
pat0890	68	1	64	60	68
pat0952	68	1	74	57
pat0962	68	0	63	63	62.5
pat0967	68	0	72	53	68.5
pat0785	69	0	71		60
pat0832	69	0	63	70	60
pat0836	69	0	73	76	59.5
pat0946	69	0	65	70	55.5
pat0979	69	0	66	66	67
pat0982	69	0	70	74	69
pat0994	69	0	70	63	65.5
pat1023	69	0	63	71	67
pat0662	70	0	68	55
pat0772	70	0	64	65
pat0814	70	0	70	66	54
pat0931	70	0	71	80
pat0971	70	0	66	54	60.5
pat0990	70	0	65	77	69
pat0993	70	0	70	66	71
pat0998	70	0	72	70
pat1011	70	0	64	45
pat0636	71	1	68		57
pat0819	71	0	69	67
pat0873	71	0	69
pat0886	71	0	67	74
pat0953	71	0	70	66	64
pat0984	71	0	69	69
pat0987	71	0	71	72
pat0815	72	0	68	60
pat0820	72	0	72	73
pat0861	72	0	65	69	65
pat0969	72	0	69	66	65
pat1003	72	0	68	73	66.5
pat1013	72	0	70	67	67.5
pat1025	72	0	68	70	71.5
pat1041	72	0	71	74	67.5
pat0722	73	1	73	66	54.5
pat0951	73	0	71	82	68.5
pat0991	73	0	66	68
pat0999	73	0	73	62	70
pat1021	73	0	70	78
pat1037	73	0	67	69
pat1038	73	1	69	77	67.5
pat1062	73	0	73		69
pat1167	73	0	73	69
pat0740	74	0	70	75
pat0791	74	0	69	68
pat0805	74	0	75	70	70.5
pat0824	74	0	62	51
pat0853	74	1	85
pat0863	74	0	64	58	64
pat0893	74	0	75	73	71.5
pat1017	74	0	75	77	71
pat1018	74	0	81	77
pat1032	74	0	87	84
pat1033	74	0	68	75
pat1034	74	0	64	64	70.5
pat1035	74	0	66	68	56
pat0802	75	0	69	73
pat0985	75	1	80	89
pat1010	75	0	74	77
pat1028	75	0	73	68
pat1045	75	0	75	65	69.5
pat1054	75	0	68	76	70.5
pat1058	75	0	78	74
pat1061	75	0	79	74	71
pat1129	75	0	69	67
pat0744	76	0	74	75
pat0835	76	0	72	78	64.5
pat0840	76	0	73	65
pat1012	76	0	76	78
pat1016	76	0	73	81
pat1046	76	0	71	64
pat1056	76	0	73	73	68
pat1057	76	0	80	78
pat1067	76	0	74	68	71
pat1073	76	0	75	69
pat0932	77	1	78	67
pat0958	77	0	72	77	72
pat0988	77	0	69	64
pat1022	77	0	72	71	67.5
pat1026	77	0	76	93	64
pat1031	77	0	79	86
pat1039	77	0	77	82	72.5
pat1042	77	0	66	68
pat1043	77	1			67.5
pat1050	77	0	72	69
pat1053	77	0	77	78	70
pat1060	77	0	77	77	68
pat1063	77	0	81	87
pat1086	77	0	69	74
pat1007	78	0	74	72	62
pat1014	78	0	76	65	72
pat1020	78	0	72	79	75
pat1085	78	1	82	79
pat1088	78	0	80	86
pat1130	78	0	80		64.5
pat0977	79	0	73	80
pat1005	79	0	77	81	73
pat1008	79	0	89	81	74
pat1051	79	0	89	76	74
pat1055	79	0	75	72	73
pat1106	79	0	78	73	67
pat0783	80	1	95
pat1009	80	0	81	73
pat1036	80	0	84	81
pat1059	80	0	87	86	69
pat1075	80	0	75	77	64.5
pat1132	80	0	75
pat1133	80	0	80		72
pat1137	80	0	78		74
pat1150	80	0	74	64
pat0996	81	1	79
pat0997	81	1	75	66	74
pat1019	81	0	79	83	70
pat1030	81	0	75	79	70
pat1052	81	0	78	77	80
pat1070	81	0			73
pat1074	81	0	78	78	75
pat1107	81	0	75	71	76.5
pat1015	82	0	81	80	77.5
pat1047	82	0			71.5
pat1072	82	0	79	74
pat1087	82	0	84		75.5
pat1101	82	0	83	79
pat1102	82	1	81	79	76
pat1103	82	0	76	81	70
pat1105	82	0	89	74	75.5
pat1149	82	1			76.5
pat1027	83	0	87	85	67.5
pat1097	83	0	85	70
pat1100	83	1	95	79	78
pat1110	83	0	84	65
pat1143	83	0	87		74.5
pat0978	84	0	84	86
pat0989	84	1	80		76.5
pat1001	84	0	94	81	73
pat1049	84	0	80	72
pat1071	84	0	79	77	72.5
pat1089	84	0	79	66	77
pat1152	84	1	80	63	77.5
pat1156	84	0	83	67	70
pat1000	85	0	80	69
pat1002	85	0	91	68
pat1006	85	0	86	85	73
pat1029	85	0	84	80	74
pat1044	85	1	83	87	79.5
pat1064	85	0	89	82	76
pat1065	85	0	92	77	75.5
pat1066	85	0	86	78	77
pat1099	85	0	85	81	78
pat1131	85	1	86
pat1158	85	1	85	86	80.5
pat1174	85	0	75	80
pat1182	85	0	87	91
pat1189	85	0	88
pat1192	85	0	81
pat0995	86	0	90	80
pat1083	86	0	83	88	72.5
pat1096	86	0	84	84	61.5
pat1190	86	1	103
pat0894	87	1	85	85
pat1040	87	0	84
pat1078	87	0	88	76
pat1098	87	0	90	84	78.5
pat1139	87	0	80
pat1154	87	0	78	78	78.5
pat1175	87	1	102		77.5
pat1194	87	0	88
pat1004	88	0	91	78	67
pat1180	88	0	84		79.5
pat1184	88	0	89	78
pat1181	89	1	92	80
pat0925	90	1	89	92
pat1080	90	0	86		79.5
pat1108	90	0	83	81
pat1138	90	0	98
pat0592	91	0	88	82	78.5
pat1090	91	0	89	70	78.5
pat1091	91	0	102	89	78.5
pat1163	91	0			83.5
pat1165	91	0	90	78	78
pat1076	92	1	93		81.5
pat1109	92	1	85		80.5
pat1112	92	0	106	92
pat1155	92	0	94	88
pat1161	92	0	98	78
pat1162	92	0	90
pat0942	93	0	92
pat0965	93	0	93	83	69
pat1077	93	0	86	77
pat1141	93	0	86
pat0943	94	0	104	95
pat1079	94	0	92		81.5
pat1081	94	0	89	78
pat1104	94	0	104	90	78.5
pat1148	94	0	88
pat1169	94	1	99
pat0976	95	1		97	83.5
pat1093	95	0	95	80	66.5
pat1134	95	0	93	80	78
pat1145	95	1	93	88
pat1140	97	1	102		81
pat1111	98	0	96	92
pat1153	99	0	100	94	86
